# Supplementary material for: Application of palladium nanoparticle supported organo-kaolinite for 4-chloro-2-nitroaniline catalytic reduction and electrochemical detection
Source: Royal Society of Chemistry journal article supplement (doi:10.1039/d2nj01453j), 2022-01-01
Supplement: d2nj01453j1.pdf [file d2nj01453j1.pdf]

## Supplementary Information

### Test confirming the formation of 4-chloro-1,2-phenylenediamine

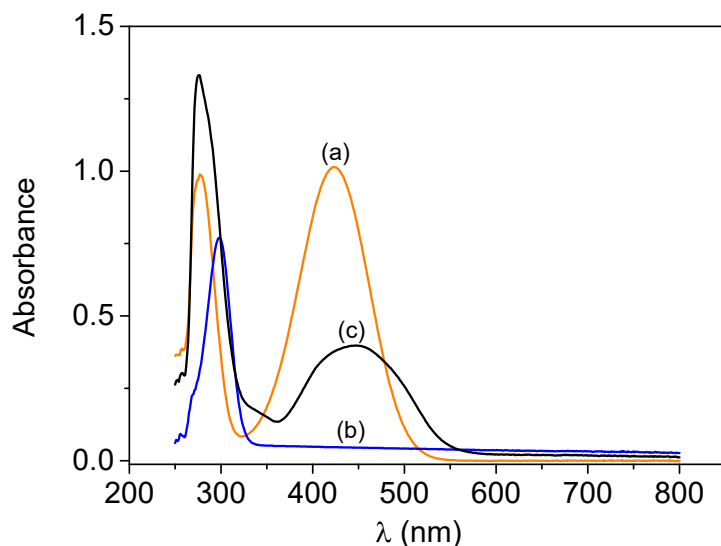

**Fig. S01** Test confirming the formation of 4-chloro-1,2-phenylenediamine after the catalytic reduction of CNA. (a) CNA 0.25 mM, (b) mixture of CNA 0.25 mM + NaBH<sub>4</sub> 6 mM + K-Pd 8 mg L<sup>-1</sup> after 12 min and (c) solution of (b) after centrifugation and 4 h exposition in sun light.

The solution of (b) purged with argon and exposed to sun light showed no evolution of the UV-Vis spectrum. The solution of (b) stored in the dark also showed no evolution of the UV-Vis spectrum. This clearly demonstrates the role of oxygen and light (visible light) for the conversion (photo-oxidation) of 4-chloro-1,2-phenylenediamine to 2,3-diamino-7-chlorophenazine with the formation of 4-chlorocyclohexa-3,5-diene-1,2-diimine as intermediate according to Equation S1 below.

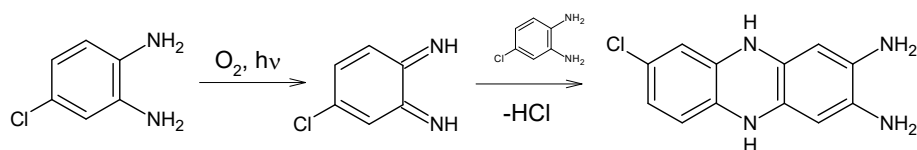

Equation S1

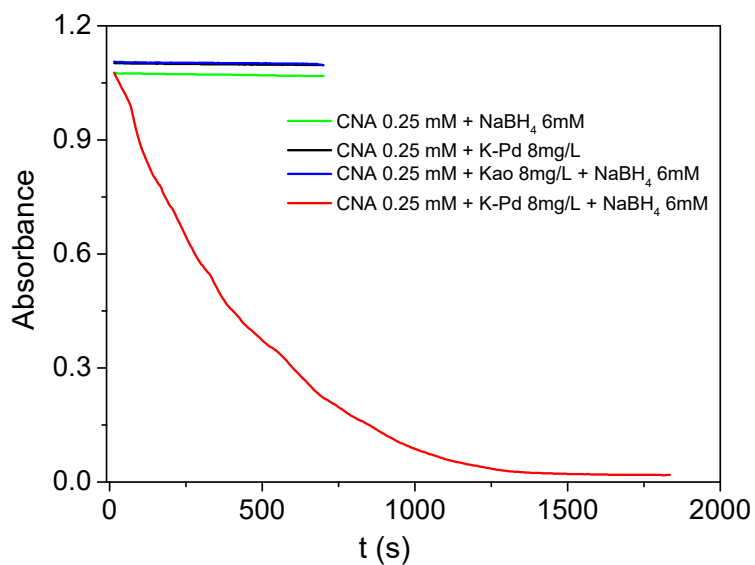

**Fig. S02** Effect of various components on the variation of the absorbance at 423 nm as a function of time in a 0.25 mM CNA solution.

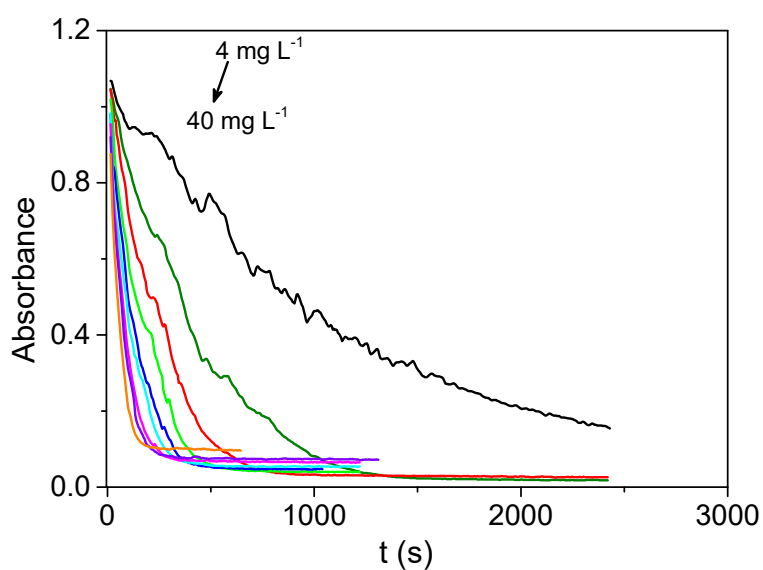

**Fig. S03** Effect of K-Pd concentration on the variation of the absorbance at 423 nm of a 0.25 mM CNA solution in the presence of  $\text{NaBH}_4$  (6 mM).

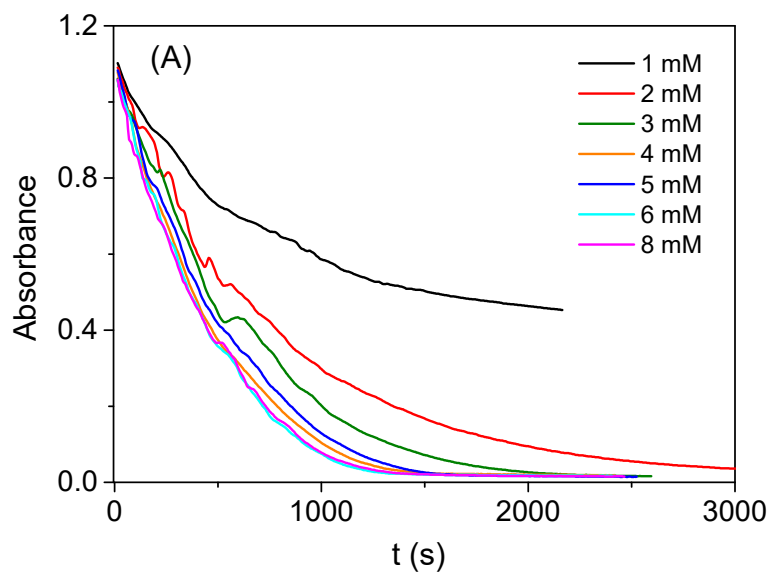

**Fig. S04** Effect of  $\text{NaBH}_4$  concentration on the variation of the absorbance at 423 nm of a 0.25 mM CNA solution in the presence of K-Pd ( $8 \text{ mg L}^{-1}$ ).

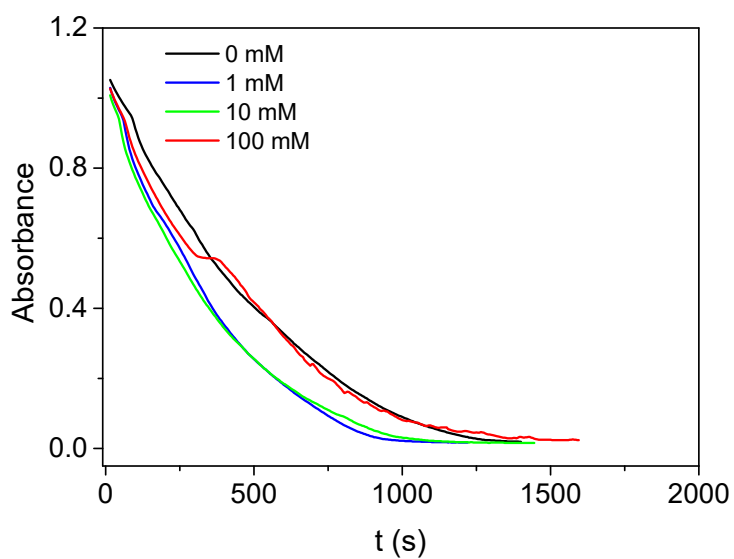

**Fig. S05** Effect of KCl concentration on the variation of the absorbance at 423 nm of a 0.25 mM CNA solution in the presence of K-Pd ( $8 \text{ mg L}^{-1}$ ) and  $\text{NaBH}_4$  (6 mM).

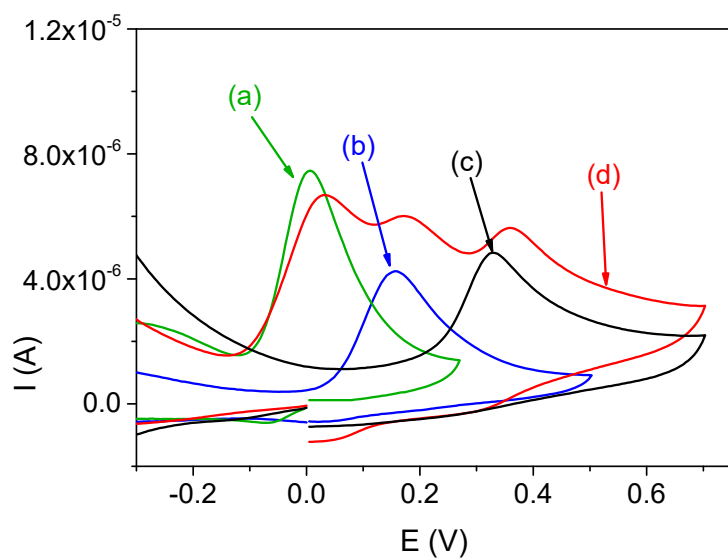

**Fig. S06** Cyclic voltammograms recorded at Au/K-Pd immersed in a phosphate buffer solution 0.1 M, pH 6.6 in presence of (a) 4-nitrocatechol 0.1 mM, (b) p-nitrophenol 0.1 mM, (c) CNA 0.1 mM and (d) the mixture CNA 0.1 mM, p-nitrophenol 0.1 mM and 4-nitrocatechol 0.1 mM.
